# Supplementary material for: Enhancing the Expression of the OsF3H Gene in Oryza sativa Leads to the Regulation of Multiple Biosynthetic Pathways and Transcriptomic Changes That Influence Insect Resistance
Source: MDPI journal article supplement (doi:10.3390/ijms232315308), 2022-12-04
Supplement: s1 [file s1]

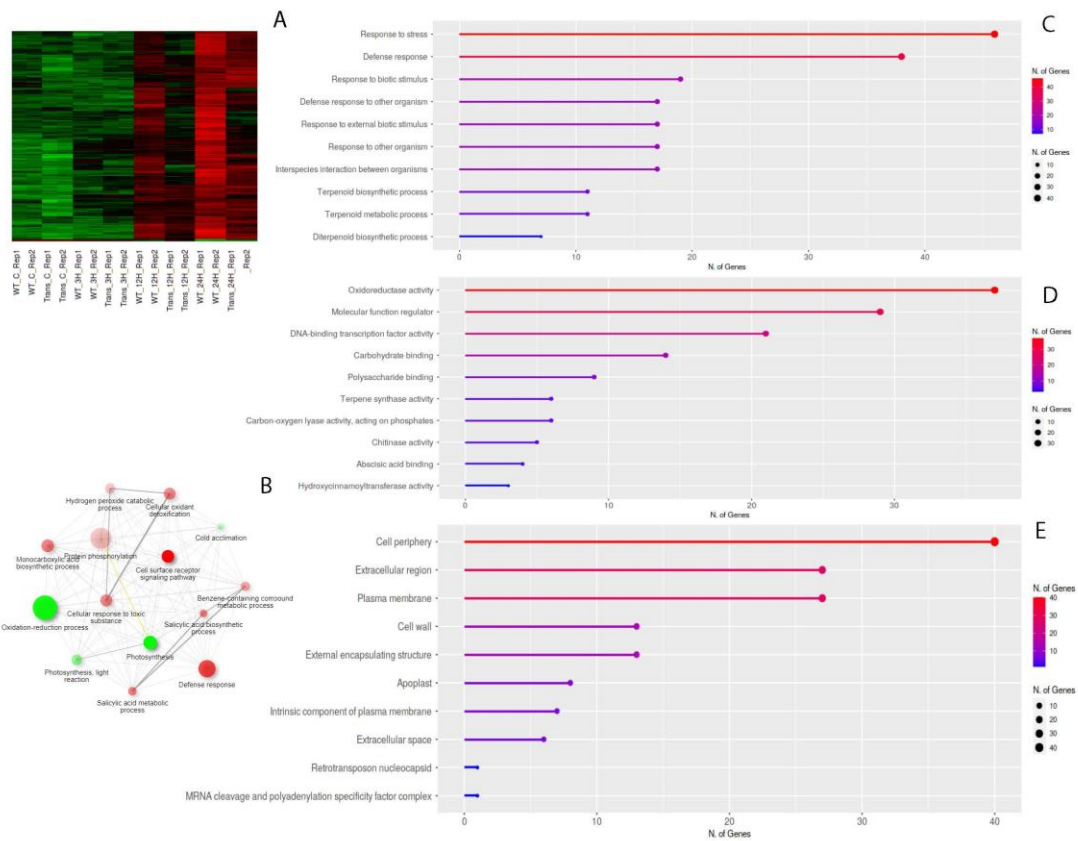

**Figure S1.** (A) Heatmap indicate the substantial difference in thousands of genes induced by WBPH in *OxF3H* plant at different time of infection, (B) Visualization of the differentially expressed genes using network analysis in *OxF3H* plants after WBPH infection, (C) Gene Ontology (GO) categories of the differentially expressed genes (DEGs) Biological process (D) Cellular components and (E) Molecular function.

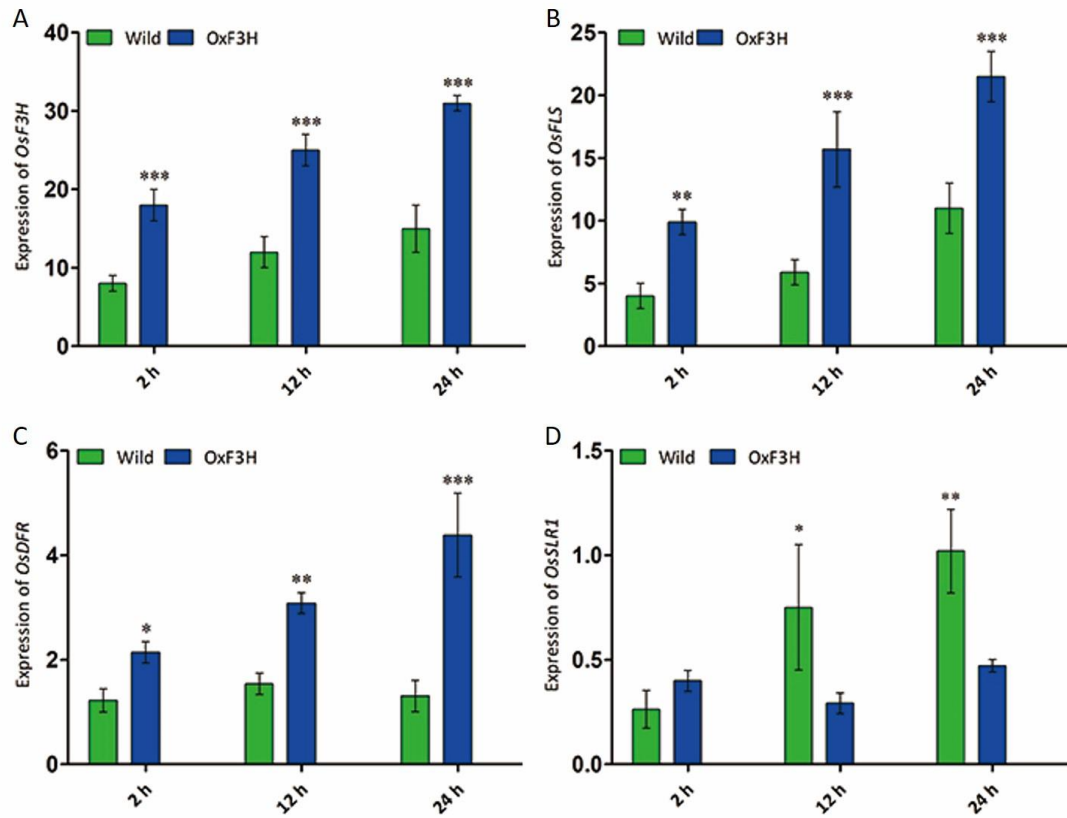

**Figure S2.** Gene expression data. (A) *OsF3H*, (B) *OsFLS*, (C) *OsDFR*, (D) *OsSLR1*. The fold change of each gene was calculated at different time points (2 h, 12 h, and 24 h). Graphs show mean $\pm$ standard deviation of three biological replicates, and asterisks show significant differences (\* $p \leq 0.05$ , \*\* $p \leq 0.01$ , and \*\*\* $p \leq 0.001$ ) according to ANOVA and Bonferroni post hoc tests. (published data).

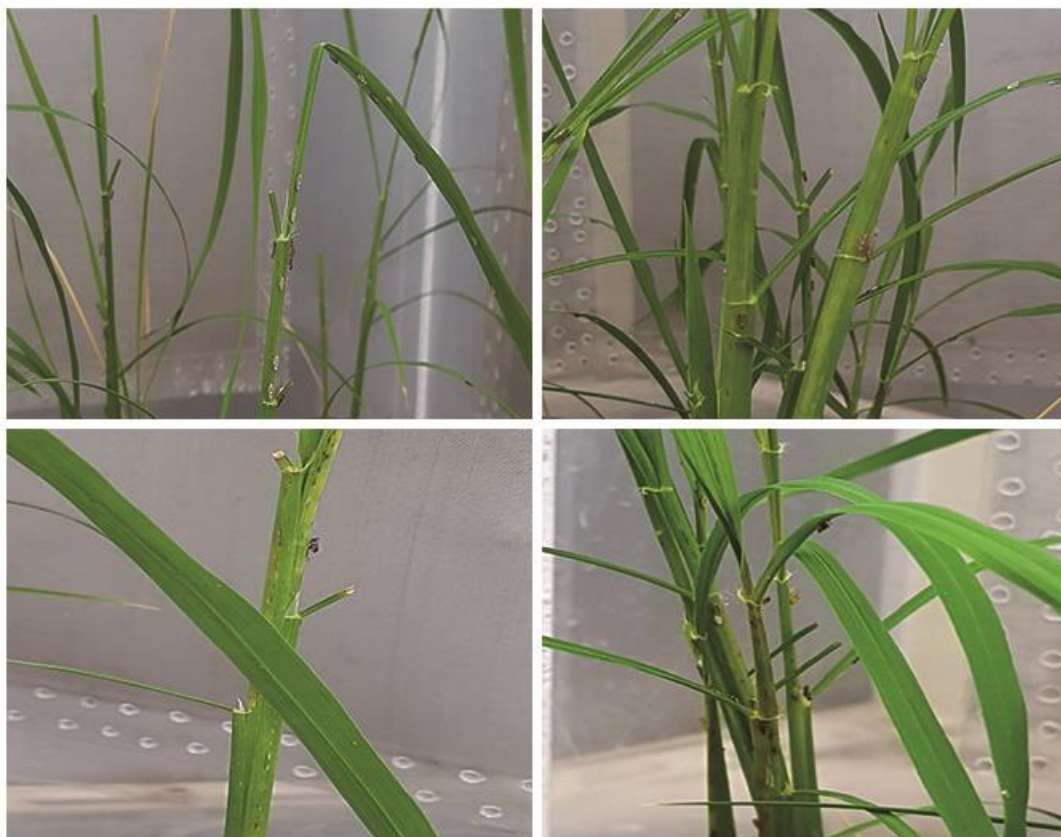

**Figure S3.** WBPH infected plants at different time intervals. We collected the samples for RNA isolation from those plants that were attacked by most of the WBPH.
