# Supplementary material for: Enhancing the Expression of the OsF3H Gene in Oryza sativa Leads to the Regulation of Multiple Biosynthetic Pathways and Transcriptomic Changes That Influence Insect Resistance
Source: MDPI journal article supplement (doi:10.3390/ijms232315308), 2022-12-04
Supplement: s1 [file s1]

## Supplementary tables

**Table S1. Raw data read information**

| Sample Name    | Read Length (bp) | Total Base (bp) | Read Count | GC (%) | Q20 Ratio (%) | Q30 Ratio (%) |
|----------------|------------------|-----------------|------------|--------|---------------|---------------|
| WT_C_Rep1      | 151              | 5,489,916,211   | 36,357,061 | 54     | 99.89%        | 97.50%        |
| WT_C_Rep2      | 151              | 4,115,572,648   | 27,255,448 | 54.5   | 99.91%        | 96.80%        |
| Trans_C_Rep1   | 151              | 5,010,381,132   | 33,181,332 | 53.5   | 99.88%        | 97.50%        |
| Trans_C_Rep2   | 151              | 5,420,212,648   | 35,895,448 | 54.5   | 99.93%        | 97.40%        |
| WT_3H_Rep1     | 151              | 5,905,519,249   | 39,109,399 | 55.5   | 99.82%        | 97.10%        |
| WT_3H_Rep2     | 151              | 5,441,207,235   | 36,034,485 | 56.5   | 99.92%        | 97.30%        |
| Trans_3H_Rep1  | 151              | 4,764,860,568   | 31,555,368 | 55     | 99.92%        | 96.80%        |
| Trans_3H_Rep2  | 151              | 5,395,248,573   | 35,730,123 | 54.5   | 99.81%        | 97.10%        |
| WT_12H_Rep1    | 151              | 6,464,777,345   | 42,813,095 | 54.5   | 99.83%        | 97.20%        |
| WT_12H_Rep2    | 151              | 4,577,771,870   | 30,316,370 | 55     | 99.91%        | 97.20%        |
| Trans_12H_Rep1 | 151              | 4,466,430,510   | 29,579,010 | 54.5   | 99.92%        | 97.10%        |
| Trans_12H_Rep2 | 151              | 5,285,092,261   | 35,000,611 | 54.5   | 99.86%        | 97.30%        |
| WT_24H_Rep1    | 151              | 4,221,921,797   | 27,959,747 | 53     | 99.93%        | 97.20%        |
| WT_24H_Rep2    | 151              | 5,325,365,622   | 35,267,322 | 52.5   | 99.84%        | 97.20%        |
| Trans_24H_Rep1 | 151              | 4,227,359,156   | 27,995,756 | 54.5   | 99.92%        | 97.20%        |
| Trans_24H_Rep2 | 151              | 4,654,043,329   | 30,821,479 | 53.5   | 99.86%        | 97.00%        |

**Table S2. Read information after Trimming with Trimmomatic**

| Sample Name        | Total reads | Both Surviving | Forward Only Surviving | Reverse Only Surviving | Drop    |
|--------------------|-------------|----------------|------------------------|------------------------|---------|
| WT_C_Rep1          | 36357061    | 36,002,720     | 257,820                | 47,396                 | 49,125  |
|                    |             | 99.03%         | 0.71%                  | 0.13%                  | 0.14%   |
| WT_C_Rep2          | 27255448    | 26,347,161     | 712,313                | 61,925                 | 134,049 |
|                    |             | 96.67%         | 2.61%                  | 0.23%                  | 0.49%   |
| Trans_C_Rep1       | 33181332    | 32,330,427     | 599,146                | 89,424                 | 162,335 |
|                    |             | 97.44%         | 1.81%                  | 0.27%                  | 0.49%   |
| Trans_C_Rep2       | 35895448    | 33,384,159     | 1,852,171              | 117,488                | 541,630 |
|                    |             | 93.00%         | 5.16%                  | 0.33%                  | 1.51%   |
| WT_3H_Rep1         | 39109399    | 38,116,498     | 677,307                | 132,710                | 182,884 |
|                    |             | 97.46%         | 1.73%                  | 0.34%                  | 0.47%   |
| WT_3H_Rep2         | 36034485    | 33,328,147     | 1,943,240              | 161,823                | 601,275 |
|                    |             | 92.49%         | 5.39%                  | 0.45%                  | 1.67%   |
| Trans_3H_Rep1      | 31555368    | 29,104,073     | 1,783,664              | 127,644                | 539,987 |
|                    |             | 92.23%         | 5.65%                  | 0.40%                  | 1.71%   |
| Trans_3H_Rep2      | 35730123    | 34,513,906     | 806,366                | 185,380                | 224,471 |
|                    |             | 96.60%         | 2.26%                  | 0.52%                  | 0.63%   |
| WT_12H_Rep1        | 42813095    | 41,158,032     | 1,177,016              | 155,260                | 322,787 |
|                    |             | 96.13%         | 2.75%                  | 0.36%                  | 0.75%   |
| WT_12H_Rep2        | 30316370    | 27,965,407     | 1,674,443              | 161,693                | 514,827 |
|                    |             | 92.25%         | 5.52%                  | 0.53%                  | 1.70%   |
| Trans_12H_Rep<br>1 | 29579010    | 27,442,236     | 1,587,781              | 80,321                 | 468,672 |
|                    |             | 92.78%         | 5.37%                  | 0.27%                  | 1.58%   |
| Trans_12H_Rep<br>2 | 35000611    | 33,933,335     | 731,474                | 125,963                | 209,839 |
|                    |             | 96.95%         | 2.09%                  | 0.36%                  | 0.60%   |
| WT_24H_Rep1        | 27959747    | 26,823,148     | 933,384                | 19,116                 | 184,099 |
|                    |             | 95.93%         | 3.34%                  | 0.07%                  | 0.66%   |
| WT_24H_Rep2        | 35267322    | 34,746,592     | 394,752                | 54,795                 | 71,183  |
|                    |             | 98.52%         | 1.12%                  | 0.16%                  | 0.20%   |
| Trans_24H_Rep<br>1 | 27995756    | 26,563,345     | 1,162,340              | 25,509                 | 244,562 |
|                    |             | 94.88%         | 4.15%                  | 0.09%                  | 0.87%   |
| Trans_24H_Rep<br>2 | 30821479    | 30,344,529     | 362,326                | 40,243                 | 74,381  |
|                    |             | 98.45%         | 1.18%                  | 0.13%                  | 0.24%   |

**Table S3. Read Alignment results with Hisat2**

| <b>Sample Name</b> | <b>Overall Alignment Rate</b> | <b>Concordant Zero</b> | <b>Concordant Pair Alignment</b> | <b>Multiple Alignment</b> |
|--------------------|-------------------------------|------------------------|----------------------------------|---------------------------|
| WT_C_Rep1          | 97.67%                        | 4.17%                  | 83.64%                           | 12.19%                    |
| WT_C_Rep2          | 97.09%                        | 5.56%                  | 89.82%                           | 4.62%                     |
| Trans_C_Rep1       | 98.19%                        | 3.75%                  | 87.34%                           | 8.91%                     |
| Trans_C_Rep2       | 98.13%                        | 4.74%                  | 90.78%                           | 4.49%                     |
| WT_3H_Rep1         | 98.50%                        | 3.18%                  | 79.43%                           | 17.39%                    |
| WT_3H_Rep2         | 98.44%                        | 4.19%                  | 91.13%                           | 4.68%                     |
| Trans_3H_Rep1      | 97.70%                        | 5.38%                  | 89.88%                           | 4.74%                     |
| Trans_3H_Rep2      | 97.97%                        | 3.91%                  | 76.61%                           | 19.47%                    |
| WT_12H_Rep1        | 95.02%                        | 6.82%                  | 79.09%                           | 14.09%                    |
| WT_12H_Rep2        | 95.08%                        | 7.55%                  | 87.69%                           | 4.76%                     |
| Trans_12H_Rep1     | 95.79%                        | 7.04%                  | 87.64%                           | 5.32%                     |
| Trans_12H_Rep2     | 96.47%                        | 5.32%                  | 79.11%                           | 15.58%                    |
| WT_24H_Rep1        | 84.77%                        | 17.22%                 | 78.79%                           | 3.99%                     |
| WT_24H_Rep2        | 83.87%                        | 17.47%                 | 67.26%                           | 15.27%                    |
| Trans_24H_Rep1     | 97.75%                        | 4.99%                  | 90.80%                           | 4.21%                     |
| Trans_24H_Rep2     | 97.80%                        | 4.02%                  | 79.96%                           | 16.02%                    |

**Tables S4 and S5 are in excel file.**

**Table S6: Primers used for qRT-PCR.**

| Gene name      | Forward primer                    | Reverse Primer                    | Amplicon length |
|----------------|-----------------------------------|-----------------------------------|-----------------|
| WRKY13         | ATGATCAGTATGGCGTGTCG (Sense)      | CCGAGCACCGGTAGTAGTTC (Antisense)  | 173             |
| WRKY45         | GGGAATTCGGTGGTCGTCAA (Sense)      | TTTGGATCTCCTTCTGCCCCG (Antisense) | 73              |
| WRKY76         | AGCTGCCCCGAATTCTAGCTT (Sense)     | AGGATCGTGAGGCCCGATAG (Antisense)  | 242             |
| OsJAZ2         | AGGTTTCGTCCTCGTTTCGT (Sense)      | TACCGGCCATGTTGTAGCTC (Antisense)  | 103             |
| ACO1           | ACTCCATCGTCGTCAACCTC (Sense)      | GAACACGAACTTGGGGTACG (Antisense)  | 209             |
| ACO2           | TCGACATGAGTCTGCTCGAC (Sense)      | ACGCTTGTAGTGGTCCTTGG (Antisense)  | 158             |
| OsACs5         | ACGGTTGACTCAGAAGGCTG (Sense)      | TGGCTGGCGTGAATGTAGTT (Antisense)  | 85              |
| EIN2           | CAGTGACAACCAACTGCTGC (Sense)      | GCTTGTATCGCTTCAGCACG (Antisense)  | 518             |
| OsFbox072/EIN3 | ACTGTCTGGTTGCTCGAAGG (Sense)      | CTCAAAGACTGCCCCATGT (Antisense)   | 70              |
| OsCOI2         | TCTCAAAATCGGAGAGATTTACAAG (Sense) | CGAAAGCAAAGCTCTCTCGC (Antisense)  | 292             |
| OsZIP08/TGA2   | TGCTTCATGTGGCTAGGTGG (Sense)      | TCCGGGTGAGGCTTCAAAAT (Antisense)  | 99              |
| OsPR1#101      | GCCAAGTAGACGACCACTCAC (Sense)     | GAAATGTACTGCGGCAGCGA (Antisense)  | 73              |
