# Supplementary material for: Enhancing the Expression of the OsF3H Gene in Oryza sativa Leads to the Regulation of Multiple Biosynthetic Pathways and Transcriptomic Changes That Influence Insect Resistance
Source: Int J Mol Sci. 2022 Dec 4;23(23):15308. doi: 10.3390/ijms232315308 (PMC9737463; doi:10.3390/ijms232315308)
Supplement: Supplementary file 1 [file ijms-23-15308-s001.zip]

Archive with 4 entries (4 files):
- ijms-2073349-supplementary figures.pdf
- Supplementary tables.pdf
- Table S4.xlsx
- Table S5.xlsx
