# Supplementary material for: Enhancing the Expression of the OsF3H Gene in Oryza sativa Leads to the Regulation of Multiple Biosynthetic Pathways and Transcriptomic Changes That Influence Insect Resistance
Source: Int J Mol Sci. 2022 Dec 4;23(23):15308. doi: 10.3390/ijms232315308 (PMC9737463; doi:10.3390/ijms232315308)
Supplement: Supplementary file 1 [file ijms-23-15308-s001.zip › Table S4.xlsx]

## Sheet: Raw data for Figure 2 A
Table S1. data use for Fiugre 2A and B
trans-wild	UP, 1324 genes	OS01G0106300	OS01G0106400	OS01G0117450	OS01G0118400	OS01G0119000	OS01G0123700	OS01G0123800	OS01G0124000	OS01G0124100	OS01G0124401	OS01G0124650	OS01G0127600	OS01G0132000	OS01G0134200	OS01G0136100	OS01G0136200	OS01G0136600	OS01G0138400	OS01G0145600	OS01G0148500	OS01G0149350	OS01G0158600	OS01G0160800	OS01G0164800	OS01G0165200	OS01G0176400	OS01G0184200	OS01G0188900	OS01G0189700	OS01G0215000	OS01G0215100	OS01G0215750	OS01G0225700	OS01G0228500	OS01G0238375	OS01G0247600	OS01G0247900	OS01G0257300	OS01G0258100	OS01G0259933	OS01G0262401	OS01G0269550	OS01G0283300	OS01G0293000	OS01G0294500	OS01G0294700	OS01G0305300	OS01G0307624
trans-wild	Down, 1289 genes	OS01G0101700	OS01G0108400	OS01G0108500	OS01G0109432	OS01G0109500	OS01G0110050	OS01G0111700	OS01G0114700	OS01G0115600	OS01G0115725	OS01G0115800	OS01G0115900	OS01G0116400	OS01G0117200	OS01G0117300	OS01G0127700	OS01G0134700	OS01G0136400	OS01G0137200	OS01G0137232	OS01G0137500	OS01G0142300	OS01G0142600	OS01G0144800	OS01G0145000	OS01G0150400	OS01G0150700	OS01G0151700	OS01G0152000	OS01G0152500	OS01G0155500	OS01G0155800	OS01G0161300	OS01G0162300	OS01G0162400	OS01G0162500	OS01G0162800	OS01G0163000	OS01G0170600	OS01G0175600	OS01G0175850	OS01G0176100	OS01G0177400	OS01G0178400	OS01G0179600	OS01G0183950	OS01G0186000	OS01G0196300
trans-wild_for_12h	UP, 1140 genes	OS01G0102850	OS01G0103050	OS01G0114800	OS01G0124401	OS01G0127900	OS01G0128000	OS01G0137700	OS01G0137800	OS01G0137875	OS01G0139000	OS01G0140700	OS01G0141000	OS01G0142600	OS01G0159000	OS01G0169800	OS01G0170800	OS01G0178400	OS01G0178500	OS01G0189100	OS01G0192900	OS01G0201100	OS01G0203400	OS01G0215750	OS01G0223300	OS01G0225400	OS01G0227700	OS01G0247700	OS01G0253500	OS01G0253900	OS01G0259933	OS01G0259966	OS01G0262401	OS01G0266400	OS01G0266800	OS01G0267300	OS01G0268600	OS01G0273800	OS01G0293000	OS01G0299150	OS01G0303100	OS01G0303800	OS01G0310700	OS01G0317500	OS01G0326100	OS01G0326300	OS01G0349000	OS01G0352100	OS01G0356951
trans-wild_for_12h	Down, 2355 genes	OS01G0101200	OS01G0102400	OS01G0106400	OS01G0108400	OS01G0108500	OS01G0108600	OS01G0108800	OS01G0109432	OS01G0110500	OS01G0111100	OS01G0115900	OS01G0123700	OS01G0123800	OS01G0123900	OS01G0124000	OS01G0124650	OS01G0127600	OS01G0130400	OS01G0132000	OS01G0136300	OS01G0137232	OS01G0138400	OS01G0139900	OS01G0152000	OS01G0152600	OS01G0155800	OS01G0159200	OS01G0159800	OS01G0160800	OS01G0162500	OS01G0168800	OS01G0174300	OS01G0175850	OS01G0180000	OS01G0180300	OS01G0180400	OS01G0183300	OS01G0191200	OS01G0195200	OS01G0195400	OS01G0196300	OS01G0197700	OS01G0198702	OS01G0202700	OS01G0205200	OS01G0206300	OS01G0207200	OS01G0208400
trans-wild_for_24h	UP, 1943 genes	OS01G0102300	OS01G0102400	OS01G0102850	OS01G0104900	OS01G0108500	OS01G0108800	OS01G0111700	OS01G0113500	OS01G0114300	OS01G0114800	OS01G0115100	OS01G0115600	OS01G0116901	OS01G0117100	OS01G0117200	OS01G0117266	OS01G0117300	OS01G0117450	OS01G0117700	OS01G0118300	OS01G0118600	OS01G0134500	OS01G0134700	OS01G0136100	OS01G0136200	OS01G0137700	OS01G0137800	OS01G0137875	OS01G0138600	OS01G0140400	OS01G0140700	OS01G0142300	OS01G0142600	OS01G0144800	OS01G0144900	OS01G0149350	OS01G0155800	OS01G0158600	OS01G0162200	OS01G0162800	OS01G0167750	OS01G0170700	OS01G0175700	OS01G0176300	OS01G0180400	OS01G0184200	OS01G0184500	OS01G0186600
trans-wild_for_24h	Down, 2792 genes	OS01G0105300	OS01G0106400	OS01G0110200	OS01G0110400	OS01G0110700	OS01G0112400	OS01G0113200	OS01G0118000	OS01G0119100	OS01G0121300	OS01G0123700	OS01G0123800	OS01G0123900	OS01G0124000	OS01G0124100	OS01G0124200	OS01G0124401	OS01G0124600	OS01G0124650	OS01G0127600	OS01G0129500	OS01G0132000	OS01G0132500	OS01G0133832	OS01G0135900	OS01G0138400	OS01G0138800	OS01G0140100	OS01G0143900	OS01G0150900	OS01G0151600	OS01G0154600	OS01G0159200	OS01G0160800	OS01G0166500	OS01G0168100	OS01G0168800	OS01G0172600	OS01G0172800	OS01G0177900	OS01G0179000	OS01G0182300	OS01G0182700	OS01G0183300	OS01G0183600	OS01G0184700	OS01G0185900	OS01G0186000
trans-wild_for_3h	UP, 1123 genes	OS01G0106300	OS01G0117450	OS01G0117500	OS01G0124401	OS01G0134700	OS01G0134900	OS01G0137700	OS01G0137800	OS01G0137875	OS01G0138400	OS01G0138600	OS01G0139000	OS01G0139700	OS01G0140700	OS01G0141000	OS01G0146200	OS01G0149350	OS01G0159800	OS01G0167900	OS01G0175400	OS01G0179000	OS01G0189100	OS01G0192550	OS01G0194300	OS01G0202700	OS01G0215750	OS01G0223300	OS01G0223900	OS01G0226300	OS01G0234001	OS01G0254850	OS01G0260000	OS01G0262401	OS01G0266400	OS01G0267300	OS01G0276200	OS01G0280400	OS01G0283000	OS01G0293000	OS01G0294500	OS01G0296000	OS01G0297200	OS01G0303100	OS01G0317500	OS01G0323000	OS01G0326100	OS01G0326300	OS01G0341200
trans-wild_for_3h	Down, 1074 genes	OS01G0101200	OS01G0110700	OS01G0111100	OS01G0136200	OS01G0150400	OS01G0152500	OS01G0155800	OS01G0180300	OS01G0183300	OS01G0191200	OS01G0197700	OS01G0200350	OS01G0207200	OS01G0208400	OS01G0213100	OS01G0220700	OS01G0221700	OS01G0221800	OS01G0224166	OS01G0225000	OS01G0229400	OS01G0229600	OS01G0235350	OS01G0238500	OS01G0253800	OS01G0257300	OS01G0286600	OS01G0302000	OS01G0307686	OS01G0309451	OS01G0327100	OS01G0329900	OS01G0337160	OS01G0339500	OS01G0341750	OS01G0342750	OS01G0343300	OS01G0348900	OS01G0349800	OS01G0350000	OS01G0356900	OS01G0371500	OS01G0377000	OS01G0382400	OS01G0382900	OS01G0495701	OS01G0505500	OS01G0510200
[truncated: 2,744 more columns]

## Sheet: Raw data for Figure 2 B 
Raw data for Figure 2 B
I:Genotype_trans-Time_12h	UP, 1511 genes	OS01G0101700	OS01G0102850	OS01G0103050	OS01G0111700	OS01G0114700	OS01G0114800	OS01G0115600	OS01G0115725	OS01G0117200	OS01G0117300	OS01G0126600	OS01G0127700	OS01G0128000	OS01G0134700	OS01G0136400	OS01G0137200	OS01G0137500	OS01G0137700	OS01G0137800	OS01G0139000	OS01G0140700	OS01G0141000	OS01G0142600	OS01G0151400	OS01G0151700	OS01G0152900	OS01G0159000	OS01G0162300	OS01G0162400	OS01G0162800	OS01G0169800	OS01G0174100	OS01G0174700	OS01G0178400	OS01G0178500	OS01G0187000	OS01G0189100	OS01G0192900	OS01G0194300	OS01G0201100	OS01G0201200	OS01G0201700	OS01G0203400	OS01G0213400	OS01G0223900	OS01G0224700	OS01G0225400	OS01G0232500
I:Genotype_trans-Time_12h	Down, 2537 genes	OS01G0102400	OS01G0106400	OS01G0108400	OS01G0108500	OS01G0108600	OS01G0108800	OS01G0111100	OS01G0113900	OS01G0117700	OS01G0118000	OS01G0119000	OS01G0123700	OS01G0123800	OS01G0123900	OS01G0124000	OS01G0124650	OS01G0124700	OS01G0127600	OS01G0130400	OS01G0132000	OS01G0134200	OS01G0135900	OS01G0136100	OS01G0136300	OS01G0136600	OS01G0138400	OS01G0139900	OS01G0140100	OS01G0143900	OS01G0148400	OS01G0149350	OS01G0149800	OS01G0159200	OS01G0159800	OS01G0160800	OS01G0166800	OS01G0168800	OS01G0171000	OS01G0176400	OS01G0180000	OS01G0180300	OS01G0180400	OS01G0183300	OS01G0183600	OS01G0187200	OS01G0188900	OS01G0191200	OS01G0194600
I:Genotype_trans-Time_24h	UP, 2120 genes	OS01G0101700	OS01G0102300	OS01G0102850	OS01G0103050	OS01G0108400	OS01G0108500	OS01G0108800	OS01G0109432	OS01G0109500	OS01G0111700	OS01G0113500	OS01G0114300	OS01G0114700	OS01G0114800	OS01G0115100	OS01G0115300	OS01G0115600	OS01G0115725	OS01G0115800	OS01G0115900	OS01G0116400	OS01G0116901	OS01G0117100	OS01G0117200	OS01G0117266	OS01G0117300	OS01G0118300	OS01G0126200	OS01G0126600	OS01G0127700	OS01G0128100	OS01G0128700	OS01G0134500	OS01G0134700	OS01G0136400	OS01G0137200	OS01G0137500	OS01G0137700	OS01G0137800	OS01G0138600	OS01G0140700	OS01G0142300	OS01G0142600	OS01G0144800	OS01G0144900	OS01G0150400	OS01G0151700	OS01G0152000
I:Genotype_trans-Time_24h	Down, 2802 genes	OS01G0105300	OS01G0106300	OS01G0106400	OS01G0110200	OS01G0110400	OS01G0110700	OS01G0110800	OS01G0113200	OS01G0118000	OS01G0118400	OS01G0119000	OS01G0119100	OS01G0121300	OS01G0123700	OS01G0123800	OS01G0123900	OS01G0124000	OS01G0124100	OS01G0124200	OS01G0124401	OS01G0124650	OS01G0127600	OS01G0129500	OS01G0130000	OS01G0132000	OS01G0132500	OS01G0133832	OS01G0135900	OS01G0136600	OS01G0138400	OS01G0138800	OS01G0140100	OS01G0143900	OS01G0145600	OS01G0146101	OS01G0148400	OS01G0148500	OS01G0151600	OS01G0159200	OS01G0160100	OS01G0160800	OS01G0164800	OS01G0165200	OS01G0166500	OS01G0168800	OS01G0172600	OS01G0176400	OS01G0177900
I:Genotype_trans-Time_3h	UP, 1322 genes	OS01G0108500	OS01G0111700	OS01G0114700	OS01G0114800	OS01G0115600	OS01G0116400	OS01G0117200	OS01G0117300	OS01G0126600	OS01G0127700	OS01G0134700	OS01G0136400	OS01G0137200	OS01G0137700	OS01G0137800	OS01G0137875	OS01G0138600	OS01G0139000	OS01G0139700	OS01G0140700	OS01G0141000	OS01G0142600	OS01G0151700	OS01G0152000	OS01G0152200	OS01G0152900	OS01G0159800	OS01G0162400	OS01G0163000	OS01G0167900	OS01G0170600	OS01G0172600	OS01G0174300	OS01G0178400	OS01G0178500	OS01G0179000	OS01G0183950	OS01G0189100	OS01G0192900	OS01G0194300	OS01G0201100	OS01G0201200	OS01G0202700	OS01G0212500	OS01G0214200	OS01G0217500	OS01G0223900	OS01G0224700
I:Genotype_trans-Time_3h	Down, 1550 genes	OS01G0106400	OS01G0111100	OS01G0119000	OS01G0123700	OS01G0123800	OS01G0124000	OS01G0124100	OS01G0132000	OS01G0136100	OS01G0136200	OS01G0143900	OS01G0144100	OS01G0148500	OS01G0149800	OS01G0155800	OS01G0158600	OS01G0160800	OS01G0165200	OS01G0171000	OS01G0176400	OS01G0180300	OS01G0183300	OS01G0183600	OS01G0189700	OS01G0191200	OS01G0207200	OS01G0208400	OS01G0213100	OS01G0215000	OS01G0215100	OS01G0217000	OS01G0221700	OS01G0228500	OS01G0229600	OS01G0238500	OS01G0243100	OS01G0247600	OS01G0247900	OS01G0249200	OS01G0257300	OS01G0276700	OS01G0283300	OS01G0286600	OS01G0294700	OS01G0305300	OS01G0305900	OS01G0306800	OS01G0307624
[truncated: 2,754 more columns]
