# Supplementary material for: Enhancing the Expression of the OsF3H Gene in Oryza sativa Leads to the Regulation of Multiple Biosynthetic Pathways and Transcriptomic Changes That Influence Insect Resistance
Source: Int J Mol Sci. 2022 Dec 4;23(23):15308. doi: 10.3390/ijms232315308 (PMC9737463; doi:10.3390/ijms232315308)
Supplement: Supplementary file 1 [file ijms-23-15308-s001.zip › Table S5.xlsx]

## Sheet: Biological Processes
Table S5. Raw data for Figure 3 (Biological Processes)
pathway	genes	group
Cell surface receptor signaling pathway	0	trans_vs_wild
Protein phosphorylation	0	trans_vs_wild
Negative regulation of peptidase activity	11	trans_vs_wild
Regulation of proteolysis	13	trans_vs_wild
Negative regulation of hydrolase activity	12	trans_vs_wild
Hydrogen peroxide catabolic process	0	trans_vs_wild
Cellular response to toxic substance	0	trans_vs_wild
Cellular oxidant detoxification	0	trans_vs_wild
Response to oxidative stress	0	trans_vs_wild
Defense response to oomycetes	0	trans_vs_wild
Response to stress	0	trans_vs_wild
SnoRNA 3 -end processing	0	trans_vs_wild
Guard cell differentiation	0	trans_vs_wild
Hormone metabolic process	0	trans_vs_wild
Hydrogen peroxide metabolic process	0	trans_vs_wild
Regulation of hormone levels	0	trans_vs_wild
Salicylic acid biosynthetic process	0	trans_vs_wild
Monocarboxylic acid biosynthetic process	0	trans_vs_wild
Benzene-containing compound metabolic process	0	trans_vs_wild
RNA modification	0	trans_vs_wild
Salicylic acid metabolic process	0	trans_vs_wild
Recognition of pollen	0	trans_vs_wild
Phosphorylation	0	trans_vs_wild
Transmembrane transport	0	trans_vs_wild
Cell surface receptor signaling pathway	22	trans_wild_3h
Protein phosphorylation	0	trans_wild_3h
Negative regulation of peptidase activity	0	trans_wild_3h
Regulation of proteolysis	0	trans_wild_3h
Negative regulation of hydrolase activity	0	trans_wild_3h
Hydrogen peroxide catabolic process	0	trans_wild_3h
Cellular response to toxic substance	23	trans_wild_3h
Cellular oxidant detoxification	22	trans_wild_3h
Response to oxidative stress	24	trans_wild_3h
Defense response to oomycetes	11	trans_wild_3h
Response to stress	97	trans_wild_3h
SnoRNA 3 -end processing	6	trans_wild_3h
Guard cell differentiation	0	trans_wild_3h
Hormone metabolic process	0	trans_wild_3h
Hydrogen peroxide metabolic process	0	trans_wild_3h
Regulation of hormone levels	0	trans_wild_3h
Salicylic acid biosynthetic process	8	trans_wild_3h
Monocarboxylic acid biosynthetic process	25	trans_wild_3h
Benzene-containing compound metabolic process	0	trans_wild_3h
RNA modification	47	trans_wild_3h
Salicylic acid metabolic process	10	trans_wild_3h
Recognition of pollen	0	trans_wild_3h
Phosphorylation	0	trans_wild_3h
Transmembrane transport	0	trans_wild_3h
Cell surface receptor signaling pathway	22	trans_wild_12h
Protein phosphorylation	0	trans_wild_12h
Negative regulation of peptidase activity	0	trans_wild_12h
Regulation of proteolysis	0	trans_wild_12h
Negative regulation of hydrolase activity	0	trans_wild_12h
Hydrogen peroxide catabolic process	0	trans_wild_12h
Cellular response to toxic substance	18	trans_wild_12h
Cellular oxidant detoxification	17	trans_wild_12h
Response to oxidative stress	0	trans_wild_12h
Defense response to oomycetes	0	trans_wild_12h
Response to stress	0	trans_wild_12h
SnoRNA 3 -end processing	0	trans_wild_12h
Guard cell differentiation	0	trans_wild_12h
Hormone metabolic process	0	trans_wild_12h
Hydrogen peroxide metabolic process	16	trans_wild_12h
Regulation of hormone levels	0	trans_wild_12h
Salicylic acid biosynthetic process	0	trans_wild_12h
Monocarboxylic acid biosynthetic process	0	trans_wild_12h
Benzene-containing compound metabolic process	0	trans_wild_12h
RNA modification	0	trans_wild_12h
Salicylic acid metabolic process	0	trans_wild_12h
Recognition of pollen	0	trans_wild_12h
Phosphorylation	0	trans_wild_12h
Transmembrane transport	0	trans_wild_12h
Cell surface receptor signaling pathway	32	trans_wild_24h
Protein phosphorylation	0	trans_wild_24h
Negative regulation of peptidase activity	0	trans_wild_24h
Regulation of proteolysis	0	trans_wild_24h
Negative regulation of hydrolase activity	0	trans_wild_24h
Hydrogen peroxide catabolic process	0	trans_wild_24h
Cellular response to toxic substance	0	trans_wild_24h
Cellular oxidant detoxification	0	trans_wild_24h
Response to oxidative stress	0	trans_wild_24h
Defense response to oomycetes	0	trans_wild_24h
Response to stress	0	trans_wild_24h
SnoRNA 3 -end processing	0	trans_wild_24h
Guard cell differentiation	24	trans_wild_24h
Hormone metabolic process	0	trans_wild_24h
Hydrogen peroxide metabolic process	0	trans_wild_24h
Regulation of hormone levels	0	trans_wild_24h
Salicylic acid biosynthetic process	0	trans_wild_24h
Monocarboxylic acid biosynthetic process	0	trans_wild_24h
Benzene-containing compound metabolic process	0	trans_wild_24h
RNA modification	57	trans_wild_24h
Salicylic acid metabolic process	0	trans_wild_24h
Recognition of pollen	0	trans_wild_24h
Phosphorylation	0	trans_wild_24h
Transmembrane transport	0	trans_wild_24h
Cell surface receptor signaling pathway	25	Genotype_trans_3h
Protein phosphorylation	91	Genotype_trans_3h
Negative regulation of peptidase activity	0	Genotype_trans_3h
Regulation of proteolysis	0	Genotype_trans_3h
Negative regulation of hydrolase activity	0	Genotype_trans_3h
Hydrogen peroxide catabolic process	15	Genotype_trans_3h
Cellular response to toxic substance	22	Genotype_trans_3h
Cellular oxidant detoxification	21	Genotype_trans_3h
Response to oxidative stress	0	Genotype_trans_3h
Defense response to oomycetes	0	Genotype_trans_3h
Response to stress	0	Genotype_trans_3h
SnoRNA 3 -end processing	0	Genotype_trans_3h
Guard cell differentiation	0	Genotype_trans_3h
Hormone metabolic process	0	Genotype_trans_3h
Hydrogen peroxide metabolic process	0	Genotype_trans_3h
Regulation of hormone levels	0	Genotype_trans_3h
Salicylic acid biosynthetic process	0	Genotype_trans_3h
Monocarboxylic acid biosynthetic process	0	Genotype_trans_3h
Benzene-containing compound metabolic process	12	Genotype_trans_3h
RNA modification	0	Genotype_trans_3h
Salicylic acid metabolic process	0	Genotype_trans_3h
Recognition of pollen	0	Genotype_trans_3h
Phosphorylation	0	Genotype_trans_3h
Transmembrane transport	0	Genotype_trans_3h
Cell surface receptor signaling pathway	22	Genotype_trans_12h
Protein phosphorylation	107	Genotype_trans_12h
Negative regulation of peptidase activity	0	Genotype_trans_12h
Regulation of proteolysis	0	Genotype_trans_12h
Negative regulation of hydrolase activity	0	Genotype_trans_12h
Hydrogen peroxide catabolic process	0	Genotype_trans_12h
Cellular response to toxic substance	0	Genotype_trans_12h
Cellular oxidant detoxification	0	Genotype_trans_12h
Response to oxidative stress	0	Genotype_trans_12h
Defense response to oomycetes	0	Genotype_trans_12h
Response to stress	0	Genotype_trans_12h
SnoRNA 3 -end processing	0	Genotype_trans_12h
Guard cell differentiation	0	Genotype_trans_12h
Hormone metabolic process	14	Genotype_trans_12h
Hydrogen peroxide metabolic process	0	Genotype_trans_12h
Regulation of hormone levels	15	Genotype_trans_12h
Salicylic acid biosynthetic process	0	Genotype_trans_12h
Monocarboxylic acid biosynthetic process	0	Genotype_trans_12h
Benzene-containing compound metabolic process	0	Genotype_trans_12h
RNA modification	0	Genotype_trans_12h
Salicylic acid metabolic process	0	Genotype_trans_12h
Recognition of pollen	14	Genotype_trans_12h
Phosphorylation	0	Genotype_trans_12h
Transmembrane transport	0	Genotype_trans_12h
Cell surface receptor signaling pathway	37	Genotype_trans_24h
Protein phosphorylation	153	Genotype_trans_24h
Negative regulation of peptidase activity	0	Genotype_trans_24h
Regulation of proteolysis	0	Genotype_trans_24h
Negative regulation of hydrolase activity	0	Genotype_trans_24h
Hydrogen peroxide catabolic process	0	Genotype_trans_24h
Cellular response to toxic substance	0	Genotype_trans_24h
Cellular oxidant detoxification	0	Genotype_trans_24h
Response to oxidative stress	0	Genotype_trans_24h
Defense response to oomycetes	0	Genotype_trans_24h
Response to stress	0	Genotype_trans_24h
SnoRNA 3 -end processing	0	Genotype_trans_24h
Guard cell differentiation	4	Genotype_trans_24h
Hormone metabolic process	0	Genotype_trans_24h
Hydrogen peroxide metabolic process	0	Genotype_trans_24h
Regulation of hormone levels	0	Genotype_trans_24h
Salicylic acid biosynthetic process	0	Genotype_trans_24h
Monocarboxylic acid biosynthetic process	0	Genotype_trans_24h
Benzene-containing compound metabolic process	0	Genotype_trans_24h
RNA modification	0	Genotype_trans_24h
Salicylic acid metabolic process	0	Genotype_trans_24h
Recognition of pollen	0	Genotype_trans_24h
Phosphorylation	166	Genotype_trans_24h
Transmembrane transport	128	Genotype_trans_24h

## Sheet: Cellular Processes
Table S5. Raw data for Figure 3 (Cellular Processes)
Pathways	nGenes	Direction	Comparison
Extracellular region	48	Down regulated	trans_wild
Plasma membrane	121	Down regulated	trans_wild
Cell periphery	134	Down regulated	trans_wild
Extracellular region	49	Up regulated	trans_wild
Chloroplast thylakoid membrane	30	Down regulated	trans_wild_3h
Thylakoid	39	Down regulated	trans_wild_3h
Chloroplast thylakoid	32	Down regulated	trans_wild_3h
Photosynthetic membrane	31	Down regulated	trans_wild_3h
Photosystem II	9	Down regulated	trans_wild_3h
Plastid envelope	28	Down regulated	trans_wild_3h
Organelle subcompartment	34	Down regulated	trans_wild_3h
Chloroplast envelope	27	Down regulated	trans_wild_3h
Extracellular region	44	Up regulated	trans_wild_3h
Cell wall	24	Up regulated	trans_wild_3h
Nucleolus	27	Up regulated	trans_wild_3h
Small nucleolar ribonucleoprotein complex	8	Up regulated	trans_wild_3h
Box H/ACA snoRNP complex	4	Up regulated	trans_wild_3h
Small-subunit processome	9	Up regulated	trans_wild_3h
Cajal body	4	Up regulated	trans_wild_3h
Plant-type cell wall	12	Up regulated	trans_wild_3h
Extracellular region	118	Down regulated	trans_wild_12h
Apoplast	41	Down regulated	trans_wild_12h
Cell periphery	250	Down regulated	trans_wild_12h
Plasma membrane	209	Down regulated	trans_wild_12h
Plastid stroma	63	Down regulated	trans_wild_12h
Chloroplast stroma	62	Down regulated	trans_wild_12h
Cell wall	41	Down regulated	trans_wild_12h
Thylakoid	56	Down regulated	trans_wild_12h
Thylakoid membrane	44	Down regulated	trans_wild_12h
Chloroplast thylakoid membrane	40	Down regulated	trans_wild_12h
Chloroplast thylakoid	45	Down regulated	trans_wild_12h
Extracellular region	41	Up regulated	trans_wild_12h
Cell wall	20	Up regulated	trans_wild_12h
Extracellular region	156	Down regulated	trans_wild_24h
Cell wall	65	Down regulated	trans_wild_24h
Cell periphery	308	Down regulated	trans_wild_24h
Apoplast	48	Down regulated	trans_wild_24h
Plasma membrane	242	Down regulated	trans_wild_24h
Anchored component of plasma membrane	28	Down regulated	trans_wild_24h
Anchored component of membrane	29	Down regulated	trans_wild_24h
Plastid stroma	47	Up regulated	trans_wild_24h
Chloroplast stroma	47	Up regulated	trans_wild_24h
Thylakoid	43	Down regulated	Genotype_trans_3h
Extracellular region	53	Down regulated	Genotype_trans_3h
Thylakoid membrane	33	Down regulated	Genotype_trans_3h
Chloroplast thylakoid	32	Down regulated	Genotype_trans_3h
Chloroplast thylakoid membrane	28	Down regulated	Genotype_trans_3h
Photosystem II	11	Down regulated	Genotype_trans_3h
Photosystem	12	Down regulated	Genotype_trans_3h
Anchored component of plasma membrane	17	Down regulated	Genotype_trans_3h
Chloroplast thylakoid lumen	4	Down regulated	Genotype_trans_3h
Apoplast	18	Down regulated	Genotype_trans_3h
Extracellular region	52	Up regulated	Genotype_trans_3h
Cell periphery	134	Up regulated	Genotype_trans_3h
Extracellular region	94	Down regulated	Genotype_trans_12h
Plastid stroma	75	Down regulated	Genotype_trans_12h
Chloroplast stroma	74	Down regulated	Genotype_trans_12h
Chloroplast	191	Down regulated	Genotype_trans_12h
Plastid	196	Down regulated	Genotype_trans_12h
Apoplast	32	Down regulated	Genotype_trans_12h
Thylakoid	58	Down regulated	Genotype_trans_12h
Cell periphery	238	Down regulated	Genotype_trans_12h
Cell wall	39	Down regulated	Genotype_trans_12h
Thylakoid membrane	44	Down regulated	Genotype_trans_12h
NAD(P)H dehydrogenase complex (plastoquinone)	5	Down regulated	Genotype_trans_12h
Chloroplast thylakoid	44	Down regulated	Genotype_trans_12h
Extracellular region	52	Up regulated	Genotype_trans_12h
Cell periphery	154	Up regulated	Genotype_trans_12h
Plasma membrane	133	Up regulated	Genotype_trans_12h
Extracellular region	135	Down regulated	Genotype_trans_24h
Cell wall	63	Down regulated	Genotype_trans_24h
Apoplast	46	Down regulated	Genotype_trans_24h
Cell periphery	297	Down regulated	Genotype_trans_24h
Plasma membrane	230	Down regulated	Genotype_trans_24h
Plant-type cell wall	22	Down regulated	Genotype_trans_24h
Anchored component of plasma membrane	25	Down regulated	Genotype_trans_24h
Anchored component of membrane	26	Down regulated	Genotype_trans_24h
Plasma membrane	198	Up regulated	Genotype_trans_24h
Cell periphery	225	Up regulated	Genotype_trans_24h

## Sheet: Molecular Processes
Table S5. Raw data for Figure 3 (Molecular Processes)
Pathways	nGenes	Direction	Comparison
Polysaccharide binding	25	Down regulated	trans_vs_wild
Carbohydrate binding	34	Down regulated	trans_vs_wild
Protein kinase activity	84	Down regulated	trans_vs_wild
Protein serine/threonine kinase activity	69	Down regulated	trans_vs_wild
ADP binding	29	Down regulated	trans_vs_wild
Chitinase activity	8	Down regulated	trans_vs_wild
Heme binding	32	Down regulated	trans_vs_wild
Serine-type endopeptidase inhibitor activity	11	Up regulated	trans_vs_wild
ADP binding	32	Up regulated	trans_vs_wild
Heme binding	34	Up regulated	trans_vs_wild
Tetrapyrrole binding	41	Down regulated	trans_wild_3h
Oxidoreductase activity, acting on paired donors, with incorporation or reduction of molecular oxygen	33	Down regulated	trans_wild_3h
Monooxygenase activity	30	Down regulated	trans_wild_3h
Heme binding	35	Down regulated	trans_wild_3h
Iron ion binding	30	Down regulated	trans_wild_3h
Oxidoreductase activity	91	Down regulated	trans_wild_3h
Oxidoreductase activity, acting on paired donors, with incorporation or reduction of molecular oxygen, NAD(P)H as one donor, and incorporation of one atom of oxygen	20	Down regulated	trans_wild_3h
O-methyltransferase activity	8	Down regulated	trans_wild_3h
Chlorophyll binding	5	Down regulated	trans_wild_3h
Peroxidase activity	23	Up regulated	trans_wild_3h
ADP binding	32	Up regulated	trans_wild_3h
Nutrient reservoir activity	9	Up regulated	trans_wild_3h
Heme binding	32	Up regulated	trans_wild_3h
Carbohydrate binding	25	Up regulated	trans_wild_3h
Recombinase activity	3	Up regulated	trans_wild_3h
Oxidoreductase activity	240	Down regulated	trans_wild_12h
Tetrapyrrole binding	87	Down regulated	trans_wild_12h
Heme binding	82	Down regulated	trans_wild_12h
Iron ion binding	69	Down regulated	trans_wild_12h
Oxidoreductase activity, acting on paired donors, with incorporation or reduction of molecular oxygen	71	Down regulated	trans_wild_12h
Monooxygenase activity	65	Down regulated	trans_wild_12h
Oxidoreductase activity, acting on paired donors, with incorporation or reduction of molecular oxygen, NAD(P)H as one donor, and incorporation of one atom of oxygen	46	Down regulated	trans_wild_12h
Terpene synthase activity	14	Down regulated	trans_wild_12h
Lyase activity	56	Down regulated	trans_wild_12h
Metal ion binding	297	Down regulated	trans_wild_12h
Carbohydrate binding	51	Down regulated	trans_wild_12h
Hydrolase activity, hydrolyzing O-glycosyl compounds	54	Down regulated	trans_wild_12h
Cation binding	298	Down regulated	trans_wild_12h
Transferase activity, transferring hexosyl groups	66	Down regulated	trans_wild_12h
UDP-glycosyltransferase activity	53	Down regulated	trans_wild_12h
ADP binding	36	Up regulated	trans_wild_12h
Heme binding	36	Up regulated	trans_wild_12h
Peroxidase activity	17	Up regulated	trans_wild_12h
Antioxidant activity	18	Up regulated	trans_wild_12h
Protein serine/threonine kinase activity	60	Up regulated	trans_wild_12h
Oxidoreductase activity	290	Down regulated	trans_wild_24h
Heme binding	109	Down regulated	trans_wild_24h
Oxidoreductase activity, acting on paired donors, with incorporation or reduction of molecular oxygen	86	Down regulated	trans_wild_24h
Iron ion binding	81	Down regulated	trans_wild_24h
Oxidoreductase activity, acting on paired donors, with incorporation or reduction of molecular oxygen, NAD(P)H as one donor, and incorporation of one atom of oxygen	57	Down regulated	trans_wild_24h
Monooxygenase activity	75	Down regulated	trans_wild_24h
Enzyme inhibitor activity	45	Down regulated	trans_wild_24h
Terpene synthase activity	20	Down regulated	trans_wild_24h
Hydrolase activity, acting on glycosyl bonds	80	Down regulated	trans_wild_24h
Serine-type endopeptidase inhibitor activity	19	Down regulated	trans_wild_24h
Hydrolase activity, hydrolyzing O-glycosyl compounds	71	Down regulated	trans_wild_24h
Endopeptidase inhibitor activity	21	Down regulated	trans_wild_24h
ADP binding	58	Up regulated	trans_wild_24h
Adenyl ribonucleotide binding	247	Up regulated	trans_wild_24h
ATP binding	227	Up regulated	trans_wild_24h
Purine nucleotide binding	257	Up regulated	trans_wild_24h
Ribonucleotide binding	258	Up regulated	trans_wild_24h
Carbohydrate derivative binding	259	Up regulated	trans_wild_24h
Carbohydrate binding	43	Up regulated	trans_wild_24h
Nucleotide binding	272	Up regulated	trans_wild_24h
Polysaccharide binding	23	Up regulated	trans_wild_24h
Purine ribonucleoside triphosphate binding	237	Up regulated	trans_wild_24h
Protein serine/threonine kinase activity	96	Up regulated	trans_wild_24h
Anion binding	281	Up regulated	trans_wild_24h
Tetrapyrrole binding	55	Down regulated	Genotype_trans_3h
Heme binding	51	Down regulated	Genotype_trans_3h
Iron ion binding	43	Down regulated	Genotype_trans_3h
Monooxygenase activity	41	Down regulated	Genotype_trans_3h
Oxidoreductase activity, acting on paired donors, with incorporation or reduction of molecular oxygen	43	Down regulated	Genotype_trans_3h
Oxidoreductase activity	125	Down regulated	Genotype_trans_3h
Oxidoreductase activity, acting on paired donors, with incorporation or reduction of molecular oxygen, NAD(P)H as one donor, and incorporation of one atom of oxygen	26	Down regulated	Genotype_trans_3h
Polysaccharide binding	25	Up regulated	Genotype_trans_3h
Carbohydrate binding	38	Up regulated	Genotype_trans_3h
Peroxidase activity	21	Up regulated	Genotype_trans_3h
ADP binding	33	Up regulated	Genotype_trans_3h
Antioxidant activity	22	Up regulated	Genotype_trans_3h
Protein kinase activity	89	Up regulated	Genotype_trans_3h
Chitinase activity	9	Up regulated	Genotype_trans_3h
Calcium ion binding	30	Up regulated	Genotype_trans_3h
Protein serine/threonine kinase activity	72	Up regulated	Genotype_trans_3h
Terpene synthase activity	8	Up regulated	Genotype_trans_3h
Phosphoribosylanthranilate isomerase activity	3	Up regulated	Genotype_trans_3h
Phosphotransferase activity, alcohol group as acceptor	91	Up regulated	Genotype_trans_3h
Oxidoreductase activity	225	Down regulated	Genotype_trans_12h
Tetrapyrrole binding	79	Down regulated	Genotype_trans_12h
Heme binding	75	Down regulated	Genotype_trans_12h
Monooxygenase activity	61	Down regulated	Genotype_trans_12h
Iron ion binding	62	Down regulated	Genotype_trans_12h
Oxidoreductase activity, acting on paired donors, with incorporation or reduction of molecular oxygen	63	Down regulated	Genotype_trans_12h
Glutathione transferase activity	21	Down regulated	Genotype_trans_12h
Transferase activity, transferring alkyl or aryl (other than methyl) groups	34	Down regulated	Genotype_trans_12h
Oxidoreductase activity, acting on paired donors, with incorporation or reduction of molecular oxygen, NAD(P)H as one donor, and incorporation of one atom of oxygen	38	Down regulated	Genotype_trans_12h
Metal ion binding	308	Down regulated	Genotype_trans_12h
Cation binding	310	Down regulated	Genotype_trans_12h
Hydrolase activity, hydrolyzing O-glycosyl compounds	52	Down regulated	Genotype_trans_12h
UDP-glucosyltransferase activity	31	Down regulated	Genotype_trans_12h
Transition metal ion binding	131	Down regulated	Genotype_trans_12h
UDP-glycosyltransferase activity	51	Down regulated	Genotype_trans_12h
Polysaccharide binding	26	Up regulated	Genotype_trans_12h
Protein kinase activity	105	Up regulated	Genotype_trans_12h
Protein serine/threonine kinase activity	87	Up regulated	Genotype_trans_12h
Calcium ion binding	34	Up regulated	Genotype_trans_12h
Carbohydrate binding	35	Up regulated	Genotype_trans_12h
Phosphotransferase activity, alcohol group as acceptor	107	Up regulated	Genotype_trans_12h
Kinase activity	113	Up regulated	Genotype_trans_12h
ADP binding	31	Up regulated	Genotype_trans_12h
Peroxidase activity	17	Up regulated	Genotype_trans_12h
Antioxidant activity	19	Up regulated	Genotype_trans_12h
Oxidoreductase activity	265	Down regulated	Genotype_trans_24h
Heme binding	98	Down regulated	Genotype_trans_24h
Oxidoreductase activity, acting on paired donors, with incorporation or reduction of molecular oxygen, NAD(P)H as one donor, and incorporation of one atom of oxygen	51	Down regulated	Genotype_trans_24h
Monooxygenase activity	68	Down regulated	Genotype_trans_24h
Oxidoreductase activity, acting on paired donors, with incorporation or reduction of molecular oxygen	74	Down regulated	Genotype_trans_24h
Iron ion binding	69	Down regulated	Genotype_trans_24h
Hydrolase activity, acting on glycosyl bonds	78	Down regulated	Genotype_trans_24h
Hydrolase activity, hydrolyzing O-glycosyl compounds	71	Down regulated	Genotype_trans_24h
Serine-type endopeptidase inhibitor activity	18	Down regulated	Genotype_trans_24h
Enzyme inhibitor activity	37	Down regulated	Genotype_trans_24h
Endopeptidase inhibitor activity	19	Down regulated	Genotype_trans_24h
Glucosyltransferase activity	44	Down regulated	Genotype_trans_24h
Carbohydrate binding	58	Up regulated	Genotype_trans_24h
Polysaccharide binding	34	Up regulated	Genotype_trans_24h
Protein kinase activity	149	Up regulated	Genotype_trans_24h
Protein serine/threonine kinase activity	119	Up regulated	Genotype_trans_24h
Phosphotransferase activity, alcohol group as acceptor	155	Up regulated	Genotype_trans_24h
Kinase activity	164	Up regulated	Genotype_trans_24h
Transferase activity, transferring phosphorus-containing groups	178	Up regulated	Genotype_trans_24h
Transmembrane transporter activity	126	Up regulated	Genotype_trans_24h
ATP binding	237	Up regulated	Genotype_trans_24h
Adenyl ribonucleotide binding	247	Up regulated	Genotype_trans_24h
ADP binding	42	Up regulated	Genotype_trans_24h
Transporter activity	130	Up regulated	Genotype_trans_24h
Anion binding	304	Up regulated	Genotype_trans_24h
Oligopeptide transmembrane transporter activity	16	Up regulated	Genotype_trans_24h
